# Supplementary material
Source: PubMed Central journal article supplement (PMC9649796)
Supplement: 41598_2022_23222_MOESM1_ESM.pdf [file 41598_2022_23222_MOESM1_ESM.pdf]

# Supplementary Information for Paper “Vagus Activation by Cold Face Test Reduces Acute Psychosocial Stress Responses”

R. Richer, J. Zenkner, A. Küderle, N. Rohleder, B. M. Eskofier

## Supplementary Table S1

Posthoc results of HR(V) measures during the MIST. Pairwise t-tests were performed separately for BL, AT, and FB subphases between pairs of MIST phases.

| <i>Subphase</i> | <i>A</i>     | <i>B</i>     | $\Delta HR$   |         |           | RMSSD         |        |           | pRR50         |        |           |
|-----------------|--------------|--------------|---------------|---------|-----------|---------------|--------|-----------|---------------|--------|-----------|
|                 |              |              | <i>t</i> (12) | p       | Hedges' g | <i>t</i> (12) | p      | Hedges' g | <i>t</i> (12) | p      | Hedges' g |
| <i>BL</i>       | <i>MIST1</i> | <i>MIST2</i> | -1.378        | 0.580   | -0.411    | 0.317         | >0.999 | 0.050     | 0.527         | >0.999 | 0.090     |
|                 |              | <i>MIST3</i> | -4.019        | 0.005** | -1.028    | 1.861         | 0.262  | 0.439     | 1.768         | 0.307  | 0.377     |
|                 | <i>MIST2</i> | <i>MIST3</i> | -2.399        | 0.101   | -0.643    | 1.703         | 0.343  | 0.381     | 1.245         | 0.711  | 0.301     |
| <i>AT</i>       | <i>MIST1</i> | <i>MIST2</i> | -2.832        | 0.045*  | -0.892    | 2.719         | 0.056  | 0.480     | 2.879         | 0.042* | 0.532     |
|                 |              | <i>MIST3</i> | -4.187        | 0.004** | -1.332    | 3.588         | 0.011* | 0.658     | 3.388         | 0.016* | 0.662     |
|                 | <i>MIST2</i> | <i>MIST3</i> | -1.571        | 0.427   | -0.414    | 1.397         | 0.563  | 0.204     | 0.934         | >0.999 | 0.145     |
| <i>FB</i>       | <i>MIST1</i> | <i>MIST2</i> | -1.936        | 0.230   | -0.367    | 0.847         | >0.999 | 0.104     | 0.973         | >0.999 | 0.130     |
|                 |              | <i>MIST3</i> | -3.528        | 0.013*  | -1.012    | 3.100         | 0.028* | 0.514     | 1.442         | 0.525  | 0.300     |
|                 | <i>MIST2</i> | <i>MIST3</i> | -2.755        | 0.053   | -0.596    | 3.292         | 0.019* | 0.383     | 1.480         | 0.494  | 0.171     |

## Supplementary Table S2.1

Heart Rate increase between BL and AT subphases for each individual MIST phase. Values are depicted as  $M \pm SD$ .

| <i>Condition Phase</i> | CFT                 | Control              |
|------------------------|---------------------|----------------------|
| MIST1                  | $1.3 \pm 5.6 \%$    | $4.34 \pm 4.73 \%$   |
| MIST2                  | $8.23 \pm 6.98 \%$  | $11.63 \pm 9.99 \%$  |
| MIST3                  | $15.16 \pm 8.09 \%$ | $11.69 \pm 10.95 \%$ |

## Supplementary Table S2.2

HR(V) responses to AT. Paired t-tests were performed between BL and AT subphases for each condition and each individual MIST phase, respectively.

| <i>Condition</i> | <i>Measure</i> | <i>A</i>  | <i>B</i>  | MIST1  |    |        |           | MIST2  |    |         |           | MIST3  |    |           |           |
|------------------|----------------|-----------|-----------|--------|----|--------|-----------|--------|----|---------|-----------|--------|----|-----------|-----------|
|                  |                |           |           | t      | df | p      | Hedges' g | t      | df | p       | Hedges' g | t      | df | p         | Hedges' g |
| <i>CFT</i>       | $\Delta HR$    | <i>AT</i> | <i>BL</i> | 0.803  | 11 | >0.999 | 0.251     | 4.086  | 11 | 0.005** | 1.359     | 6.491  | 11 | <0.001*** | 1.886     |
|                  | <i>RMSSD</i>   | <i>AT</i> | <i>BL</i> | 2.058  | 11 | 0.192  | 0.423     | -1.404 | 11 | 0.564   | -0.215    | -3.911 | 11 | 0.007**   | -0.461    |
|                  | <i>pRR50</i>   | <i>AT</i> | <i>BL</i> | 2.315  | 11 | 0.123  | 0.475     | -1.029 | 11 | 0.977   | -0.216    | -2.754 | 11 | 0.056     | -0.370    |
| <i>Control</i>   | $\Delta HR$    | <i>AT</i> | <i>BL</i> | 3.311  | 12 | 0.019* | 0.655     | 4.199  | 12 | 0.004** | 0.894     | 3.850  | 12 | 0.007**   | 0.762     |
|                  | <i>RMSSD</i>   | <i>AT</i> | <i>BL</i> | -1.290 | 12 | 0.664  | -0.202    | -3.103 | 12 | 0.027*  | -0.534    | -1.936 | 12 | 0.230     | -0.351    |
|                  | <i>pRR50</i>   | <i>AT</i> | <i>BL</i> | -0.724 | 12 | >0.999 | -0.052    | -2.740 | 12 | 0.054   | -0.473    | -1.177 | 12 | 0.786     | -0.258    |

## Supplementary Table S3

Post-hoc results (interaction effect MIST Phase x Condition) of HR(V) measures during BL subphase. Pairwise t-tests were performed for each MIST phase between Control and CFT condition.

| <i>Measure</i>         | MIST1  |        |        |           | MIST2  |        |        |           | MIST3  |        |           |           |
|------------------------|--------|--------|--------|-----------|--------|--------|--------|-----------|--------|--------|-----------|-----------|
|                        | t      | df     | p      | Hedges' g | t      | df     | p      | Hedges' g | t      | df     | p         | Hedges' g |
| $\Delta HR$            | -1.430 | 21.285 | 0.502  | -0.545    | -2.854 | 17.471 | 0.032* | -1.076    | -4.092 | 14.976 | 0.003**   | -1.533    |
| $\hat{t}_{Glo}(HR)$    | -1.098 | 22.179 | 0.853  | -0.420    | -2.733 | 18.937 | 0.040* | -1.034    | -4.420 | 21.696 | <0.001*** | -1.688    |
| <i>RMSSD</i>           | -1.273 | 16.590 | 0.662  | -0.479    | -0.595 | 18.823 | >0.999 | -0.225    | 0.051  | 21.529 | >0.999    | 0.020     |
| $\hat{t}_{Glo}(RMSSD)$ | 0.269  | 23     | >0.999 | 0.104     | 1.405  | 22.813 | 0.520  | 0.540     | 1.022  | 22.846 | 0.952     | 0.396     |
| <i>pRR50</i>           | -1.354 | 19.977 | 0.573  | -0.514    | -0.326 | 22.841 | >0.999 | -0.125    | -0.294 | 20.864 | >0.999    | -0.112    |
| $\hat{t}_{Glo}(pRR50)$ | -0.356 | 22.823 | >0.999 | -0.138    | 1.044  | 21.031 | 0.925  | 0.408     | 1.453  | 22.898 | 0.479     | 0.562     |

## Supplementary Table S4

Mixed-ANOVA results (interaction effect MIST Phase x Condition) of HR(V) measures during RP/CFI subphase.

| <i>Measure</i>         | $F(2, 46)$ | p      | $\eta_p^2$ |
|------------------------|------------|--------|------------|
| $\Delta HR$            | 2.266      | 0.115  | 0.090      |
| $\hat{t}_{Glo}(HR)$    | 3.369      | 0.043* | 0.128      |
| <i>RMSSD</i>           | 0.113      | 0.893  | 0.005      |
| $\hat{t}_{Glo}(RMSSD)$ | 0.018      | 0.982  | 0.001      |
| <i>pRR50</i>           | 0.034      | 0.967  | 0.002      |
| $\hat{t}_{Glo}(pRR50)$ | 0.128      | 0.880  | 0.005      |

## Supplementary Table S5

Mixed-ANOVA results (interaction effect Time x Condition) of self-reported mood, assessed via MDBF.

| <i>Dimension</i>    | $F(1, 23)$ | p     | $\eta_p^2$ |
|---------------------|------------|-------|------------|
| <i>Good-Bad</i>     | 0.009      | 0.923 | 0.000      |
| <i>Awake-Tired</i>  | 0.087      | 0.770 | 0.004      |
| <i>Calm-Nervous</i> | 0.650      | 0.428 | 0.028      |

## Supplementary Table S6

Mixed-ANOVA results (main effect Condition) of self-reported mood, assessed via MDBF.

| <i>Dimension</i>    | $F(1, 23)$ | p     | $\eta_p^2$ |
|---------------------|------------|-------|------------|
| <i>Good-Bad</i>     | 0.054      | 0.819 | 0.002      |
| <i>Awake-Tired</i>  | 2.356      | 0.139 | 0.093      |
| <i>Calm-Nervous</i> | 0.176      | 0.678 | 0.008      |

## Supplementary Figure S1

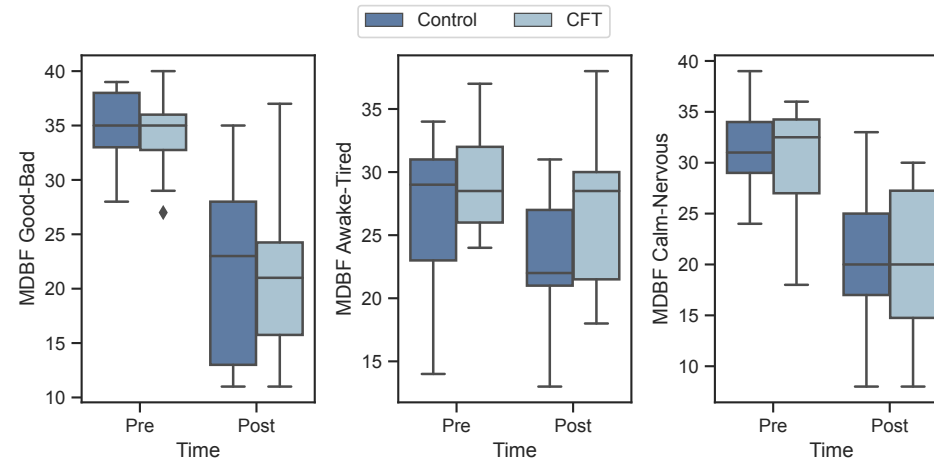

Self-reported mood, assessed via MDBF, before and after MIST for each condition individually.

## Supplementary Table S7

T-tests of cortisol measures between Control and CFT condition.

| <i>Measure</i>   | U  | p      | Hedges' g |
|------------------|----|--------|-----------|
| $AUC_G$          | 64 | 0.463  | -0.380    |
| $AUC_I$          | 44 | 0.068  | -0.787    |
| $\Delta c_{max}$ | 40 | 0.041* | -0.863    |
| $a_{S1S4}$       | 36 | 0.024* | -0.887    |
